## HALOBACTERIAL A-ATP SYNTHASE IN RELATION TO V-ATPase

BY KUNIO IHARA, TADAHIRO ABE, KEN-ICHIRO SUGIMURA  
AND YASUO MUKOHATA\*

*Department of Biology, Faculty of Science, Nagoya University, Nagoya, 464-01, Japan*

### Summary

The head piece separated from the A-ATP synthase of *Halobacterium halobium* hydrolyses ATP. This A<sub>1</sub>-ATPase is inhibited by nitrate but not by other chaotropic anions. The nitrate inhibition is noncompetitive with respect to ATP, reversible, and partially protected by chloride. In contrast, ATP synthase *in situ* (A<sub>1</sub>A<sub>0</sub>-ATPase) is not inhibited by nitrate but apparently is inhibited by stronger chaotropic reagents, such as thiocyanate and trichloroacetate, which make the vesicle membrane permeable to protons. The mode of action of nitrate and chaotropic anions seems to differentiate A-ATPases from V-ATPases.

Other strains of *Halobacterium*, *Haloferax*, *Haloarcula*, *Halococcus* and *Natronobacterium*, contain at least two polypeptides immunochemically similar to the two major subunits,  $\alpha$  ( $86 \times 10^3 M_r$  on SDS-PAGE) and  $\beta$  ( $64 \times 10^3 M_r$ ), of the A-ATPase of *Halobacterium halobium*. When solubilized, membrane vesicles of these halobacteria hydrolyse ATP. Their ATPases are commonly sensitive to nitrate. They require high concentrations of the supporting salt but depend differently on chloride or sulfate/sulfite. The A-ATPases of Halobacteriaceae appear to diverge with respect to salt preference.

### Introduction

The ATP synthase in an extremely halophilic archaeobacterium, *Halobacterium halobium* (*salinarium*), is an A-ATPase (Mukohata and Yoshida, 1987*b*; Mukohata and Ihara, 1990); it differs from the F-ATPase that had been considered to be ubiquitous throughout aerobic organisms and to be the central enzyme of ATP synthesis. The difference between the A-ATPase and F-ATPase was first shown enzymologically by the azide insensitivity of halobacterial ATP synthase (Mukohata and Yoshida, 1987*a,b*) and its A<sub>1</sub>-ATPase (Nanba and Mukohata, 1987), then immunochemically, by the relatively small cross reaction of F-ATPase with an anti-halobacterial A<sub>1</sub>-ATPase antibody (Mukohata *et al.* 1987*a*). (The halobacterial ATPase discussed here is the catalytic head-piece of the ATP synthase and thus corresponds to F<sub>1</sub>-ATPase with respect to F<sub>1</sub>F<sub>0</sub>-ATP synthase. The ATPase is denoted as A<sub>1</sub>-ATPase and the ATP synthase as A<sub>1</sub>A<sub>0</sub>-ATPase, when needed.) To our surprise, the antibody cross reacted with V-ATPase as much as it did with the A-ATPase of another kind of archaeobacterium (Mukohata *et al.* 1987*a*). This

\* To whom reprint requests should be addressed.

close relationship between A-ATPases and V-ATPases and the remote relationship between F-ATPases and A/V-ATPases were confirmed by the identity (homology) values of the amino acid sequences deduced from the genes coding the ATPases (Denda *et al.* 1988*a,b*; Inatomi *et al.* 1989; Ihara and Mukohata, 1991).

The relationship was then discussed with reference to the evolution of the proton-translocating ATPase family (Gogarten *et al.* 1989; Iwabe *et al.* 1989; Mukohata *et al.* 1990). The diversion of the A-ATPase from the V-ATPase took place long after the F-ATPase had diverged from the A/V-ATPase.

V-ATPases have been modified on the various endomembranes: vacuole, chromaffin granule, synaptosome, Golgi apparatus, and so on (Forgac, 1989). The A-ATPase has also been modified, possibly in different ways, in the extreme environments of archaeobacterial habitats.

Halobacterial ATP synthase ( $A_1A_o$ -ATPase) is not inhibited by nitrate, whereas its  $\alpha_3\beta_3$  head piece ( $A_1$ -ATPase) is inhibited (Mukohata and Ihara, 1990). The V-ATPase *in situ*, which is thought to be equivalent to the ATP synthase ( $F_1F_o$  and  $A_1A_o$ ), is inhibited by nitrate but its head piece does not hydrolyse ATP.

In this report, we describe some effects of nitrate and other chaotropic anions that differentiate A-ATPases and V-ATPases. We also describe some features which even differentiate the A-ATPase of one member of the Halobacteriaceae from that of other members.

### Materials and methods

*Halobacterium halobium* (salinarium) R<sub>1</sub>mR was separated as a spontaneous mutant from *Halobacterium halobium* R<sub>1</sub> (from D. J. Kushner, University of Ottawa). *Halobacterium halobium* DSM670, *Halobacterium saccharovorum* DSM1137, *Halobacterium sodomense* ATCC33755, *Haloferax volcanii* ATCC29605, *Haloarcula vallismortis* ATCC29715, *Halococcus morrhuae* DSM1307 and *Natronobacterium pharaonis* DSM2160 were purchased from the Institute for Fermentation (Osaka). *Halobacterium* and *Halococcus* were cultivated in media as reported previously (Matsuno-Yagi and Mukohata, 1977). *Haloferax* and *Haloarcula* were cultivated in 15.6% NaCl, 2%  $MgSO_4 \cdot 7H_2O$ , 0.4% KCl, 1.3%  $MgCl_2 \cdot 6H_2O$ , 0.1%  $CaCl_2 \cdot 2H_2O$ , 0.02%  $NaHCO_3$ , 0.05% KBr, 0.1% glucose and 0.5% yeast extract, pH 7.0. *Natronobacterium* was cultivated in 25% NaCl, 0.1%  $KH_2PO_4$ , 0.1%  $NH_4Cl$ , 0.1% sodium glutamate, 0.017%  $CaSO_4 \cdot 2H_2O$ , 0.024%  $MgSO_4 \cdot 7H_2O$ , 0.1% KCl, 0.5% casamino acid and 0.5% yeast extract at pH 9.0. All cultures were vigorously shaken for 1 week at 37–40°C. Cells were collected by centrifugation. Membrane vesicles were prepared by sonication as described by Mukohata *et al.* (1986). Protein concentration was determined by the Lowry method using bovine serum albumin as a standard.

Unless otherwise noted, ATP hydrolytic activity was determined at 40°C in a reaction mixture of 1.5 mol l<sup>-1</sup>  $Na_2SO_4$ , 10 mmol l<sup>-1</sup>  $MnSO_4$ , 4 mmol l<sup>-1</sup> ATP and 40 mmol l<sup>-1</sup> Mes at pH 5.8 (Nanba and Mukohata, 1987). The reaction was started by adding the membrane vesicles, which had been solubilized with 0.7% Triton X-165 at a final protein concentration between 0.2 and 0.6 mg ml<sup>-1</sup>. Liberated inorganic phosphate (P<sub>i</sub>) was

determined by the method of Taussky and Shorr (1953) or by the the Malachite Green method of Hess and Derr (1975). ATP synthetic activity was determined by the method of Mukohata *et al.* (1986), in which membrane vesicles of *Halobacterium halobium* were loaded with the reaction medium (1 mol l<sup>-1</sup> NaCl or 1 mol l<sup>-1</sup> sodium isethionate, 0.1 mol l<sup>-1</sup> MgCl<sub>2</sub>, 5 mmol l<sup>-1</sup> ADP, 20 mmol l<sup>-1</sup> P<sub>i</sub> and 50 mmol l<sup>-1</sup> Pipes at pH 6.8) by sonication, and washed with substrate-free medium. When needed, 10 mmol l<sup>-1</sup> chaotropic reagents were added to the medium. ATP was synthesized by base-acid transition ( $\Delta$ pH=2.8) (Mukohata *et al.* 1986) and determined by the luciferin-luciferase method.

Western blotting was performed as described by Towbin *et al.* (1979). Proteins were separated by SDS-polyacrylamide gel electrophoresis (PAGE) as described by Laemmli (1970), transferred to a polyvinylidene difluoride membrane (Millipore, Bedford) and hybridized with an antibody raised in rabbits against each of the subunits ( $\alpha$  and  $\beta$ ) of *Halobacterium halobium* A<sub>1</sub>-ATPase. After the second hybridization with alkaline-phosphatase-conjugated goat anti-rabbit IgG, the hybridized proteins were visualized by mixing them with 5-bromo-4-chloro-3-indolylphosphate and tetrazolium.

All other reagents were purchased from Wako Chemical Co. (Osaka) and Nacalai Chemicals (Kyoto).

## Results

*Halobacterium halobium* A<sub>1</sub>-ATPase showed complex kinetics for ATP hydrolysis in a 1.5 mol l<sup>-1</sup> Na<sub>2</sub>SO<sub>4</sub> assay solution, as was found for the *Halobacterium saccharovorum* ATPase in 4 mol l<sup>-1</sup> NaCl (Schobert and Lanyi, 1989) (Fig. 1). Apparently, the rate of P<sub>i</sub> release consists of two components: the rate  $V_1$  found within the initial 1 min, which is not affected by nitrate concentration, and the rate  $V_2$  after 3 min, which is affected by nitrate concentration. Here, we discuss only the nitrate-sensitive  $V_2$ . Lineweaver-Burk plots

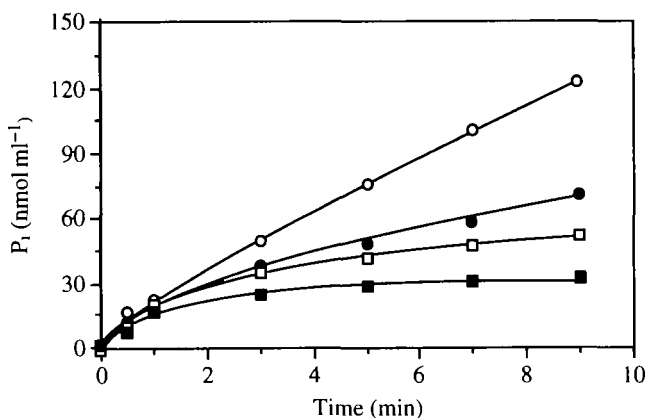

Fig. 1. An example of the effect of nitrate on ATP hydrolysis by *Halobacterium halobium* ATPase. The final protein concentration was 0.3 mg ml<sup>-1</sup>. Nitrate was added at 0 mmol l<sup>-1</sup> (○), 2 mmol l<sup>-1</sup> (●), 10 mmol l<sup>-1</sup> (□) and 50 mmol l<sup>-1</sup> (■).

show that the nitrate inhibition is noncompetitive with a fixed  $K_m$  for ATP of  $2.5 \text{ mmol l}^{-1}$  and an apparent  $K_i$  for nitrate of about  $3 \text{ mmol l}^{-1}$  (data not shown).

*Halobacterium halobium*  $A_1$ -ATPase activity was examined for the effects of several anions, most of which appear in the Hofmeister series (Table 1). Nitrate inhibits the ATPase whereas other reagents, even more chaotropic ones, do not. Although chloride and acetate seem to activate ATPase activity to some extent, only chloride increased the  $I_{50}$  value of nitrate by sixfold (Table 2). When the potassium salts of these anions were added, similar results were obtained.

The effects of these anions on ATP synthesis in the membrane vesicles of *Halobacterium halobium* were also examined (Table 3). Just as it had little effect in solutions containing  $1 \text{ mol l}^{-1}$  NaCl as supporting salt (the salt required for halophilic

Table 1. *The effects of anions on the ATP hydrolytic activity of the solubilized membrane of Halobacterium halobium*

| Additional salt         | Percentage activity          |                              |                               |
|-------------------------|------------------------------|------------------------------|-------------------------------|
|                         | $1 \text{ mmol l}^{-1}$ salt | $3 \text{ mmol l}^{-1}$ salt | $10 \text{ mmol l}^{-1}$ salt |
| None                    | 100                          | 100                          | 100                           |
| Sodium trichloroacetate | $104 \pm 5$                  | $104 \pm 15$                 | $85 \pm 3$                    |
| Sodium thiocyanate      | $101 \pm 11$                 | $102 \pm 6$                  | $93 \pm 8$                    |
| NaI                     | $102 \pm 6$                  | $100 \pm 4$                  | $98 \pm 7$                    |
| $\text{NaClO}_4$        | $104 \pm 6$                  | $106 \pm 11$                 | $85 \pm 4$                    |
| $\text{NaNO}_3$         | $59 \pm 5$                   | $47 \pm 6$                   | $26 \pm 4$                    |
| NaBr                    | $100 \pm 5$                  | $99 \pm 6$                   | $103 \pm 7$                   |
| NaCl                    | $102 \pm 2$                  | $105 \pm 11$                 | $107 \pm 4$                   |
| Sodium acetate          | $107 \pm 4$                  | $103 \pm 1$                  | $118 \pm 10$                  |

The halobacterial membrane vesicles were suspended in  $1.0 \text{ mol l}^{-1}$   $\text{Na}_2\text{SO}_4$ ,  $10 \text{ mmol l}^{-1}$  Mes (pH 5.8) and dialyzed against  $1.0 \text{ mol l}^{-1}$   $\text{Na}_2\text{SO}_4$  to minimize the carrying-over chloride in the preparation. The membrane vesicles were then solubilized and assayed for ATP hydrolysis ( $100\% = 95 \pm 16 \text{ nmol P}_i \text{ min}^{-1} \text{ mg}^{-1} \text{ protein}$ ).

Values are expressed as the mean  $\pm$  standard deviation of four independent measurements.

Table 2. *The  $I_{50}$  values of nitrate for Halobacterium halobium ATPase in the presence of various added salts*

| Additions          | $I_{50} (\text{mmol l}^{-1})$ |
|--------------------|-------------------------------|
| Control            | $4.1 \pm 0.5$                 |
| Sodium isethionate | $5.7 \pm 1.9$                 |
| Sodium acetate     | $4.4 \pm 1.5$                 |
| NaBr               | $7.5 \pm 2.2$                 |
| NaCl               | $29.5 \pm 4.4$                |

The salt ( $0.8 \text{ mol l}^{-1}$ ) was added to the reaction medium containing  $1.0 \text{ mol l}^{-1}$   $\text{Na}_2\text{SO}_4$ ,  $10 \text{ mmol l}^{-1}$   $\text{MnSO}_4$ ,  $4 \text{ mmol l}^{-1}$  ATP,  $40 \text{ mmol l}^{-1}$  Mes (pH 5.8). For the control,  $0.5 \text{ mol l}^{-1}$   $\text{Na}_2\text{SO}_4$  was added.

The  $I_{50}$  value is almost constant between  $1.0$  and  $2.0 \text{ mol l}^{-1}$   $\text{Na}_2\text{SO}_4$  for the supporting salt solution. The means and standard deviations of three determinations are given.

enzymes to maintain their functions), nitrate did not inhibit ATP synthesis in solutions containing  $1 \text{ mol l}^{-1}$  sodium isethionate, which does not protect the ATPase from nitrate inhibition (Table 2). Chaotropic reagents much stronger than nitrate, such as thiocyanate and trichloroacetate, did inhibit ATP synthesis.

The subunit sizes and salt-dependency of the ATPases of Halobacteriaceae were examined. Antibodies raised against each of the subunits ( $\alpha$  and  $\beta$ ) of *Halobacterium halobium* A<sub>1</sub>-ATPase were tested for their cross reactions to the whole-cell proteins of various halobacterial strains. The sizes of the two major subunits of all the strains were similar to the individual subunits of *Halobacterium halobium* ATPase:  $86 \times 10^3 M_r$  ( $\alpha$  subunit) and  $64 \times 10^3 M_r$  ( $\beta$  subunit) on SDS-PAGE (Fig. 2).

Membrane vesicles prepared from various halobacteria showed little ATPase activity without the addition of detergent. After the vesicles had been solubilized with Triton X-165, ATPase activity became detectable (Table 4). As has been demonstrated with

Table 3. *The effects of anions on ATP synthesis by the membrane vesicles of Halobacterium halobium*

| Salt added<br>( $10 \text{ mmol l}^{-1}$ ) | Percentage activity                |                                                  |
|--------------------------------------------|------------------------------------|--------------------------------------------------|
|                                            | NaCl<br>( $1 \text{ mol l}^{-1}$ ) | Sodium isethionate<br>( $1 \text{ mol l}^{-1}$ ) |
| None                                       | 100                                | 100                                              |
| Sodium trichloroacetate                    | 13                                 | 23                                               |
| Sodium thiocyanate                         | 12                                 | 25                                               |
| NaI                                        | 91                                 | 113                                              |
| $\text{NaClO}_4$                           | 91                                 | 91                                               |
| $\text{NaNO}_3$                            | 98                                 | 107                                              |

The ATP synthesized in 30 s after a pH jump (external pH 6.8 to 4.3) was measured.

The activities of the control (none) in  $1 \text{ mol l}^{-1}$  NaCl and  $1 \text{ mol l}^{-1}$  sodium isethionate were 266 and 339 pmol ATP  $\text{mg}^{-1}$  protein, respectively.

Results of two independent measurements were averaged.

Table 4. *The ATP hydrolytic activity of solubilized membrane of various halobacterial strains*

| Strain                                          | Activity (nmol $\text{P}_i \text{ min}^{-1} \text{ mg}^{-1}$ protein) |                                                                  |
|-------------------------------------------------|-----------------------------------------------------------------------|------------------------------------------------------------------|
|                                                 | In $4 \text{ mol l}^{-1}$ NaCl<br>(pH 7.0)                            | In $1.5 \text{ mol l}^{-1}$ $\text{Na}_2\text{SO}_4$<br>(pH 5.8) |
| <i>Halobacterium halobium</i> R <sub>1</sub> mR | $20 \pm 3$                                                            | $84 \pm 8$                                                       |
| <i>Halobacterium halobium</i> DSM670            | $18 \pm 3$                                                            | $81 \pm 5$                                                       |
| <i>Halobacterium saccharovorum</i>              | $69 \pm 7$                                                            | $62 \pm 8$                                                       |
| <i>Halobacterium sodomense</i>                  | $75 \pm 2$                                                            | $63 \pm 4$                                                       |
| <i>Haloarcula vallismortis</i>                  | $57 \pm 5$                                                            | $27 \pm 7$                                                       |
| <i>Haloferax volcanii</i>                       | $9 \pm 3$                                                             | $9 \pm 2$                                                        |

The means and standard deviations of three determinations are given.

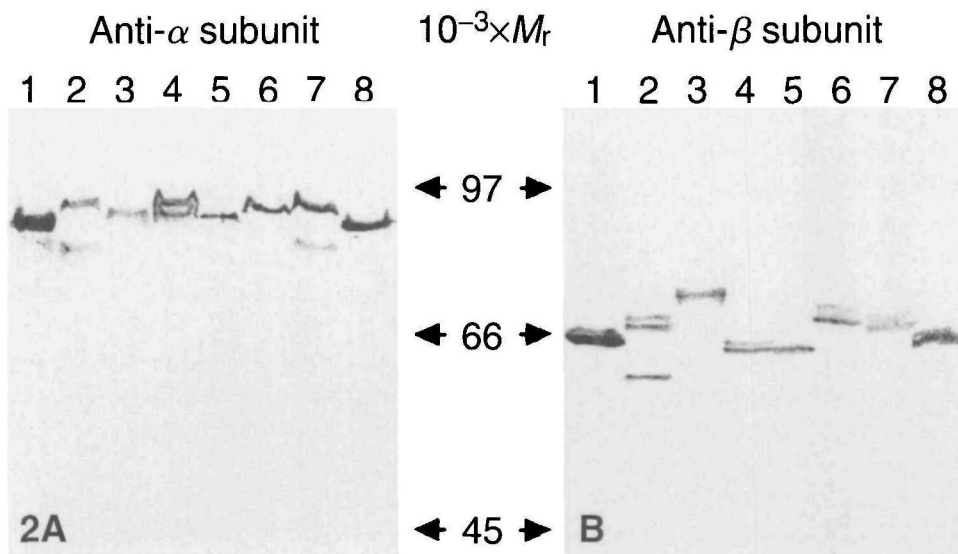

Fig. 2. Diversity of the subunit sizes in ATPases of Halobacteriaceae. Western blots of the proteins of various halobacterial strains were performed with the antibodies raised against the  $\alpha$  and  $\beta$  subunits of *Halobacterium halobium* ATPase. Whole cells were solubilized and electrophoresed on a 10% SDS gel. Cross reactions were performed with (A) anti- $\alpha$  subunit and (B) anti- $\beta$  subunit. The relative molecular masses are indicated. Lanes 1, 8, *Halobacterium halobium*; lane 2, *Natronobacterium pharaonis*; lane 3, *Halococcus morrhuae*; lane 4, *Haloferax volcanii*; lane 5, *Haloarcula vallismortis*; lane 6, *Halobacterium sodomense*; lane 7, *Halobacterium saccharovororum*.

*Halobacterium halobium* (Nanba and Mukohata, 1987), this result is found because the vesicles were in the right-side-out configuration with catalytic  $A_1$  sectors inside. ATP was hydrolysed only after the membranes had been solubilized and the  $A_1$ -ATPase had been released. The ATPases of *Halobacterium halobium* R<sub>1</sub>mR and DSM670 were much more active in  $1.5 \text{ mol l}^{-1} \text{ Na}_2\text{SO}_4$  at pH 5.8 than in  $4 \text{ mol l}^{-1} \text{ NaCl}$  at pH 7.0. In contrast, the ATPases of *Halobacterium saccharovororum*, *Halobacterium sodomense* and *Haloarcula vallismortis* were more active in  $4 \text{ mol l}^{-1} \text{ NaCl}$  than in  $1.5 \text{ mol l}^{-1} \text{ Na}_2\text{SO}_4$ . The ATPase of *Haloferax volcanii* exhibited only low activity in both media.

## Discussion

### A-ATPases and V-ATPases

A-ATPases and V-ATPases, like F-ATPases, are  $\text{H}^+$ -translocating enzymes composed of a catalytic head piece, a stem and a membrane-embedded channel (Pedersen and Carafoli, 1987a; Penefsky and Cross, 1991; Mukohata *et al.* 1992). A-ATPases and F-ATPases usually synthesize ATP under the proton-motive force, whereas V-ATPases only hydrolyse ATP to pump protons across membrane into endosomal vesicles. The halobacterial ATP synthase of present interest is a type of A-ATPase ( $A_1A_o$ ) that is similar to V-ATPases ( $V_1V_o$ ). The halobacterial ATPase under discussion is the head

piece separated from the ATP synthase and thus designated the  $A_1$ -ATPase. The halobacterial  $A_1$ -ATPase appears to be composed of  $\alpha_3\beta_3$  subunits (Mukohata *et al.* 1991); no other subunit is needed for ATP hydrolysis. The  $F_1$ -ATPase is composed of  $\alpha_3\beta_3\gamma$  or  $\alpha_3\beta_3\delta$  as the functional complex (Yoshida *et al.* 1977), although an  $\alpha_3\beta_3$  complex of the thermophilic bacterium PS3 has been shown to hydrolyse ATP (Miwa and Yoshida, 1989).

#### *The effects of nitrate and chloride on Halobacterium halobium $A_1$ -ATPase*

*Halobacterium halobium*  $A_1$ -ATPase is inhibited by nitrate with an  $I_{50}$  value of about  $3 \text{ mmol l}^{-1}$  in  $1.5 \text{ mol l}^{-1}$   $\text{Na}_2\text{SO}_4$  (Mukohata and Ihara, 1990). Since reagents that are even more chaotropic than nitrate, such as thiocyanate and chlorate, were less effective inhibitors (Table 1), one can conclude that nitrate inhibited the  $A_1$ -ATPase specifically. The addition of chloride or acetate apparently activated the ATPase; this effect became very obvious as the concentration of chloride or acetate increased. However, the  $I_{50}$  value increased as the chloride concentration was increased, but not as the acetate, isethionate or sulfate concentration was increased. Therefore, chloride seems to protect the ATPase from nitrate inhibition to some extent. This protective effect of chloride is not due merely to the increase in concentration of salts that support the integrity of the enzyme and/or activate it.

$100 \text{ mmol l}^{-1}$  nitrate completely inhibits the halobacterial  $A_1$ -ATPase. However, removal of nitrate by dialysis restores the initial activity of the sample to the level observed before the addition of nitrate (data not shown). Reversibility of nitrate inhibition was also reported for *Halobacterium saccharovorum* ATPase (Schobert and Lanyi, 1989).

The activity of *Halobacterium halobium* ATPase is very low in solutions of NaCl or KCl as the supporting salt, even at  $4 \text{ mol l}^{-1}$ , and is much higher in solutions of  $\text{Na}_2\text{SO}_3$  ( $1.5 \text{ mol l}^{-1}$ ) and sodium citrate ( $0.8 \text{ mol l}^{-1}$ ) (Nanba and Mukohata, 1987). *Halobacterium saccharovorum* ATPase (Hochstein *et al.* 1987; Stan-Lotter and Hochstein, 1989; Schobert and Lanyi, 1989) and some halobacterial ATPases show higher activity at pH 7.0 in  $4 \text{ mol l}^{-1}$  NaCl than in  $1.5 \text{ mol l}^{-1}$   $\text{Na}_2\text{SO}_4$  (Table 4). Therefore, the requirement for a high (supporting) salt concentration of halobacterial ATPases in general is largely due to a salting-out type of action, which makes the subunit complex tight enough to hydrolyse ATP. The tightness needed would probably differ among ATPases even in the halobacterial family, depending on the structures of the subunits (see below). The preference for the supporting salt could be explained in a similar way. Activating effects of  $\text{SO}_4^{2-}$  and  $\text{HSO}_3^-$  are reported in the  $A_1$ -ATPase of *Sulfolobus acidocaldarius* (Konishi *et al.* 1987; Lübben *et al.* 1987) and *Methanosarcina barkeri* (Inatomi, 1986). However, the concentrations of the supporting salts in these reaction media were very low ( $20\text{--}30 \text{ mmol l}^{-1}$ ). The effect of sulfate may not be same on all A-ATPases.

#### *Effects of chaotropic anions on ATP synthesis*

Nitrate only inhibits the halobacterial ATP synthesis slightly in  $1 \text{ mol l}^{-1}$  NaCl, even at  $100 \text{ mmol l}^{-1}$ , a level that almost completely inhibits ATP hydrolysis in  $1.5 \text{ mol l}^{-1}$

Na<sub>2</sub>SO<sub>4</sub> (Mukohata and Ihara, 1990). As in the case of ATP hydrolysis (Table 2), 1 mol l<sup>-1</sup> NaCl loaded into the vesicles may protect ATP synthesis from nitrate inhibition. However, ATP is synthesized in 1 mol l<sup>-1</sup> sodium isethionate in amounts similar to or even greater than those in 1 mol l<sup>-1</sup> NaCl. Nitrate does not inhibit the ATP synthesis either in sodium isethionate or in NaCl (Table 3). Since isethionate does not protect ATP hydrolysis from nitrate inhibition (Table 2), these results indicate that ATP synthesis is not affected by nitrate. The ATP synthase of *Halobacterium halobium* is the membrane-anchored holoenzyme (A<sub>1</sub>A<sub>0</sub>), whereas the isolated A<sub>1</sub>-ATPase is the  $\alpha_3\beta_3$  head piece of the synthase. There is probably a nitrate binding site(s), which is characterized by non-competitive inhibition. When the head piece is detached as the A<sub>1</sub>-ATPase from the ATP synthase, the nitrate binding site should be exposed or its affinity for nitrate should be increased, which eventually inhibits ATP hydrolysis.

Slight inhibition of ATP synthesis by nitrate may be due to the chaotropic nature of nitrate. As shown in Table 3, the degree of inhibition of ATP synthesis roughly follows the Hofmeister series: SCN<sup>-</sup>, CCl<sub>3</sub>COO<sup>-</sup> > I<sup>-</sup> > ClO<sub>4</sub><sup>-</sup> > NO<sub>3</sub><sup>-</sup>. Additions of chaotropic anions to the external medium also depressed ATP synthesis. Moreover, these anions caused a faster decay of the light-induced pH shift of the membrane vesicle suspension (data not shown). Therefore, the reagents seem to make the membrane leaky to protons, which should diminish the proton-motive force and decrease ATP synthesis.

By contrast, chaotropic anions destroy V-ATPases by releasing the head piece, which carries no ATP hydrolysing activity (Rea *et al.* 1987; Bowman *et al.* 1989; Moriyama and Nelson, 1989; Arai *et al.* 1989). Halobacterial A<sub>1</sub>-ATPase was not released from the membrane vesicles to any marked extent by various chaotropic anions (data not shown). Thus, the mode of action of chaotropic anions differs between A-ATPases and V-ATPases.

By analogy with F-ATPase, the *N,N'*-dicyclohexylcarbodiimide (DCCD)-binding protein is considered to be part of the membrane-embedded component of H<sup>+</sup>-translocating A-ATPase/synthase. [<sup>14</sup>C]DCCD labeled two polypeptides of 78 and 12×10<sup>3</sup> M<sub>r</sub> (by SDS-PAGE) in parallel with the inhibition of ATP synthesis in *Halobacterium halobium* (Mukohata *et al.* 1987b). The *N*-cyclohexyl *N'*-[4-(dimethylamide)- $\alpha$ -naphthyl] carbodiimide (NCD-4)-binding protein of 10×10<sup>3</sup> M<sub>r</sub> (by gel filtration in the presence of SDS) was isolated (K.-I. Sugimura, S. Watanabe, K. Ihara and Y. Mukohata, unpublished results). The DCCD-binding protein of 10 362 Da was also isolated from *Sulfolobus acidocaldarius* (Denda *et al.* 1989). The size of this DCCD-binding protein is almost in the range of the *c* subunit of F<sub>1</sub>F<sub>0</sub>-ATPase but not in the range of the corresponding subunit of V-ATPase, which has a duplicated mass of 16×10<sup>3</sup> M<sub>r</sub> (Mandel *et al.* 1988; Nelson and Nelson, 1989). This is another difference between A-ATPases and V-ATPases.

#### *The A-ATPase family of Halobacteriaceae*

The relative molecular masses of the two major subunits of *Halobacterium halobium* ATPase are similar to those of other A-ATPases and V-ATPases (Mukohata *et al.* 1991, 1992). The apparent relative molecular masses of the *Halobacterium halobium* ATPase subunits, estimated by SDS-PAGE, are 86×10<sup>3</sup> for the  $\alpha$  subunit and 64×10<sup>3</sup> for the  $\beta$

subunit (Nanba and Mukohata, 1987). These  $M_r$  values are much larger than those estimated from amino acid sequences deduced from the encoding genes: 64 104 Da for the  $\alpha$  subunit and 51 956 Da for the  $\beta$  subunit (Ihara and Mukohata, 1991). This discrepancy is probably due to the excess content of acidic amino acids (approximately 20%) that is characteristic of halophilic enzymes. Western blot analysis using the antibody to *Halobacterium halobium* ATPase revealed that various halobacterial strains carry A-ATPase subunits of similar sizes (Fig. 2). The size diversity is a little wider among the  $\beta$  subunits than among the  $\alpha$  subunits, which carry the ATP-binding region. Since the sizes as well as the amino acid sequences of the subunits are well conserved, even among the A-ATPases of the three different groups (Denda *et al.* 1988*a,b*; Inatomi *et al.* 1989; Ihara and Mukohata, 1991), the actual sizes of these ATPase subunits of Halobacteriaceae should be similar. The apparently larger subunit sizes on SDS-PAGE suggest that, like *Halobacterium halobium* ATPase, all of these subunits contain large amounts of acidic amino acids (Ihara and Mukohata, 1991). Such high contents (and the distribution) of acidic amino acids probably result not only in the apparent diversity of the subunit sizes on SDS-PAGE but also in the different salt preferences.

### References

- ARAI, H., PINK, S. AND FORGAC, M. (1989). Interaction of anions and ATP with the coated vesicle proton pump. *Biochemistry*, N.Y. **28**, 3075–3082.
- BOWMAN, B. J., DSCHIDA, W. J., HARRIS, T. AND BOWMAN, E. J. (1989). The vacuolar ATPase of *Neurospora crassa* contains an  $F_1$ -like structure. *J. biol. Chem.* **264**, 15606–15612.
- DENDA, K., KONISHI, J., OSHIMA, T., DATE, T. AND YOSHIDA, M. (1988*a*). The membrane-associated ATPase from *Sulfolobus acidocaldarius* is distantly related to  $F_1$ -ATPase as assessed from the primary structure of its  $\alpha$ -subunit. *J. biol. Chem.* **263**, 6012–6015.
- DENDA, K., KONISHI, J., OSHIMA, T., DATE, T. AND YOSHIDA, M. (1988*b*). Molecular cloning of the  $\beta$ -subunit of possible non  $F_0F_1$  type ATP synthase from the acidothermophilic archaebacterium, *Sulfolobus acidocaldarius*. *J. biol. Chem.* **263**, 17251–17254.
- DENDA, K., KONISHI, J., OSHIMA, T., DATE, T. AND YOSHIDA, M. (1989). A gene encoding the proteolipid subunit of *Sulfolobus acidocaldarius* ATPase complex. *J. biol. Chem.* **264**, 7119–7121.
- FORGAC, M. (1989). Structure and function of vacuolar class of ATP-driven proton pumps. *Physiol. Rev.* **69**, 765–796.
- GOGARTEN, J. P., KIBAK, H., DITTRICH, P., TAIZ, L., BOWMAN, E. J., BOWMAN, B. J., MANOLSON, M. F., POOLE, R. J., DATE, T., OSHIMA, T., KONISHI, J., DENDA, K. AND YOSHIDA, M. (1989). Evolution of the vacuolar  $H^+$ -ATPase: Implications for the origin of eukaryotes. *Proc. natn. Acad. Sci. U.S.A.* **86**, 6661–6665.
- HESS, H. H. AND DERR, J. E. (1975). Assay of inorganic and organic phosphorus in the 0–5 nanomole range. *Analyt. Biochem.* **63**, 607–613.
- HOCHSTEIN, L. I., KRISTJANSSON, H. AND ALTEKAR, W. (1987). The purification and subunit structure of a membrane-bound ATPase from the archaebacterium *Halobacterium saccharovororum*. *Biochem. biophys. Res. Commun.* **147**, 295–300.
- IHARA, K. AND MUKOHATA, Y. (1991). The ATP synthase of *Halobacterium salinarum* (*halobium*) is an archaebacterial type as revealed from the amino acid sequences of its two major subunits. *Arch Biochem. Biophys.* **286**, 111–116.
- INATOMI, K. (1986). Characterization and purification of the membrane-bound ATPase of the archaebacterium *Methanosarcina barkeri*. *J. Bacteriol.* **167**, 837–841.
- INATOMI, K., EYA, S., MAEDA, M. AND FUTAI, M. (1989). Amino acid sequence of the  $\alpha$  and  $\beta$  subunits of *Methanosarcina barkeri* ATPase deduced from cloned gene. *J. biol. Chem.* **264**, 10954–10959.
- IWABE, N., KUMA, K., HASEGAWA, M., OSAWA, S. AND MIYATA, T. (1989). Evolutionary relationship of archaebacteria, eubacteria, and eukaryotes inferred from phylogenetic trees of duplicated genes. *Proc. natn. Acad. Sci. U.S.A.* **86**, 9355–9359.

- KONISHI, J., WAKAGI, T., OSHIMA, T. AND YOSHIDA, M. (1987). Purification and properties of the ATPase solubilized from membrane of an acidothermophilic archaebacterium, *Sulfolobus acidocaldarius*. *J. Biochem., Tokyo* **102**, 1379–1387.
- LAEMMLI, U. K. (1970). Cleavage of structural proteins during the assembly of the head of bacteriophage T4. *Nature* **227**, 680–685.
- LÜBBEN, M., LÜNSDORF, H. AND SCHÄFER, G. (1987). The plasma membrane ATPase of the thermoacidophilic archaebacterium *Sulfolobus acidocaldarius*; Purification and immunological relationships to F<sub>1</sub>-ATPases. *Eur. J. Biochem.* **167**, 211–219.
- MANDEL, M., MORIYAMA, Y., HULMES, J. D., PAN, Y., NELSON, H. AND NELSON, N. (1988). cDNA sequence encoding the 16-kDa proteolipid of chromaffin granules implies gene duplication in the evolution of H<sup>+</sup>-ATPase. *Proc. natn. Acad. Sci. U.S.A.* **85**, 5521–5524.
- MATSUNO-YAGI, A. AND MUKOHATA, Y. (1977). Two possible roles of bacteriorhodopsin; a comparative study of strains of *Halobacterium halobium* differing in pigmentation. *Biochem biophys. Res. Commun.* **78**, 237–243.
- MIWA, K. AND YOSHIDA, M. (1989). The  $\alpha_3\beta_3$  complex, the catalytic core of F<sub>1</sub>-ATPase. *Proc. natn. Acad. Sci. U.S.A.* **86**, 6484–6487.
- MORIYAMA, Y. AND NELSON, N. (1989). Cold inactivation of vacuolar proton-ATPases. *J. biol. Chem.* **264**, 3577–3582.
- MUKOHATA, Y. AND IHARA, K. (1990). Situation of archaebacterial ATPase among ion-translocating ATPase. In *Bioenergetics* (ed. C. H. Kim and T. Ozawa), pp. 205–216. New York: Plenum Press.
- MUKOHATA, Y., IHARA, K., KISHINO, H., HASEGAWA, M., IWABE, N. AND MIYATA, T. (1990). Close evolutionary relatedness of archaebacteria with eukaryotes. *Proc. Japan Acad.* **66B**, 63–67.
- MUKOHATA, Y., IHARA, K., YOSHIDA, M., KONISHI, J., SUGIYAMA, Y. AND YOSHIDA, M. (1987a). The halobacterial H<sup>+</sup>-translocating ATP synthase relates to the eukaryotic anion-sensitive proton ATPase. *Archs Biochem. Biophys.* **259**, 650–653.
- MUKOHATA, Y., IHARA, K., YOSHIDA, M. AND SUGIYAMA, Y. (1991). The ATP synthase in extremely halophilic archaebacteria and its relatives. In *New Era of Bioenergetics* (ed. Y. Mukohata), pp. 169–196. Tokyo: Academic Press.
- MUKOHATA, Y., ISOYAMA, M. AND FUKU, A. (1986). ATP synthesis in cell envelope vesicles of *Halobacterium halobium* driven by membrane potential and/or base–acid transition. *J. Biochem., Tokyo* **99**, 1–8.
- MUKOHATA, Y., ISOYAMA, M., FUKU, A., SUGIYAMA, Y., IHARA, K., YOSHIDA, M. AND NANBA, T. (1987b). A H<sup>+</sup>-translocating ATP synthase in *H. halobium*. In *Perspectives of Biological Energy Transduction* (ed. Y. Mukohata, M. F. Morales and S. Fleischer), pp. 331–338. Tokyo: Academic Press.
- MUKOHATA, Y., SUGIYAMA, Y. AND IHARA, K. (1992). Photophosphorylation elements in halobacteria: an A-type ATP synthase and bacterial rhodopsins. *J. Bioenerg. Biomembr.* (in press).
- MUKOHATA, Y. AND YOSHIDA, M. (1987a). Activation and inhibition of ATP synthesis in cell envelope vesicles of *Halobacterium halobium*. *J. Biochem., Tokyo* **101**, 311–318.
- MUKOHATA, Y. AND YOSHIDA, M. (1987b). The proton-translocating ATP synthase in *Halobacterium halobium* differs from F<sub>0</sub>F<sub>1</sub> ATPase-synthase. *J. Biochem., Tokyo* **102**, 797–802.
- NANBA, T. AND MUKOHATA, Y. (1987). A membrane-bound ATPase from *Halobacterium halobium* purification and characterization. *J. Biochem., Tokyo* **102**, 591–598.
- NELSON, H. AND NELSON, N. (1989). The progenitor of ATP synthase was closely related to the current vacuolar H<sup>+</sup>-ATPase. *FEBS Lett.* **247**, 147–153.
- PEDERSEN, P. L. AND CARAFOLI, E. (1987a). Ion motive ATPases. I. Ubiquity, properties, and significance to cell function. *Trends biochem. Sci.* **12**, 146–150.
- PEDERSEN, P. L. AND CARAFOLI, E. (1987b). Ion motive ATPases. II. Energy coupling and work output. *Trends biochem. Sci.* **12**, 186–189.
- PENEFSKY, H. S. AND CROSS, R. L. (1991). *Structure and Mechanism of F<sub>0</sub>F<sub>1</sub>-type ATP Synthases and ATPases* (ed. A. Meister), pp. 173–214. New York: John Wiley.
- REA, P. A., GRIFFITH, C. J., MANOLSON, M. F. AND SANDERS, D. (1987). Irreversible inhibition of H<sup>+</sup>-ATPase of higher plant tonoplast by chaotropic anions: evidence for peripheral location of nucleotide-binding subunits. *Biochim. biophys. Acta* **904**, 1–14.
- SCHOBERT, B. AND LANYI, J. K. (1989). Hysteretic behavior of an ATPase from the archaebacterium *Halobacterium saccharovororum*. *J. biol. Chem.* **264**, 12805–12812.
- STAN-LOTTER, H. AND HOCHSTEIN, L. I. (1989). A comparison of an ATPase from the archaebacterium

- Halobacterium saccharovorum* with the  $F_1$  moiety from the *Escherichia coli* ATP synthase. *Eur. J. Biochem.* **179**, 155–160.
- TAUSSKY, H. H. AND SHORR, E. (1953). A microcolorimetric method for the determination of inorganic phosphate. *J. biol. Chem.* **202**, 675–685.
- TOWBIN, H., STAEGELIN, T. AND GORDON, J. (1979). Electrophoretic transfer of proteins from polyacrylamide gels to nitrocellulose sheets: Procedure and some applications. *Proc. natn. Acad. Sci. U.S.A.* **76**, 4350–4354.
- YOSHIDA, M., SONE, N., HIRATA, H. AND KAGAWA, Y. (1977). Reconstitution of adenosine triphosphatase of thermophilic bacterium from purified individual subunits. *J. biol. Chem.* **252**, 3480–3485.



Photographs taken at Telluride

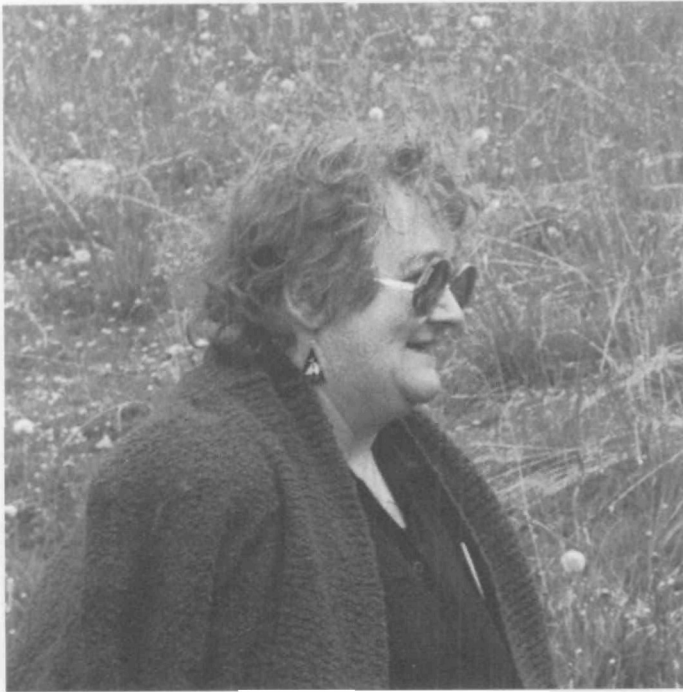

M. Clements

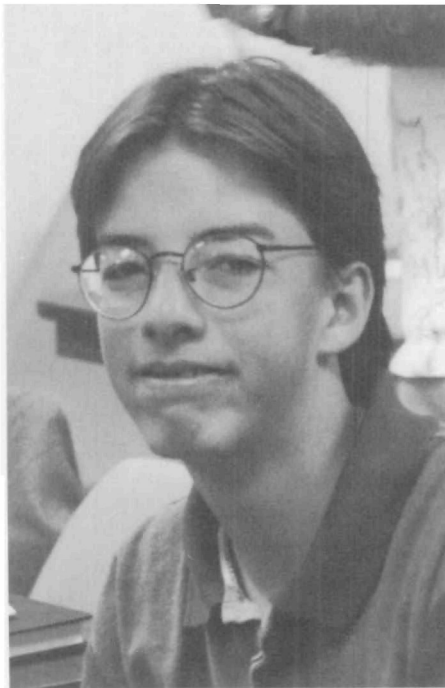

B. Gaddis

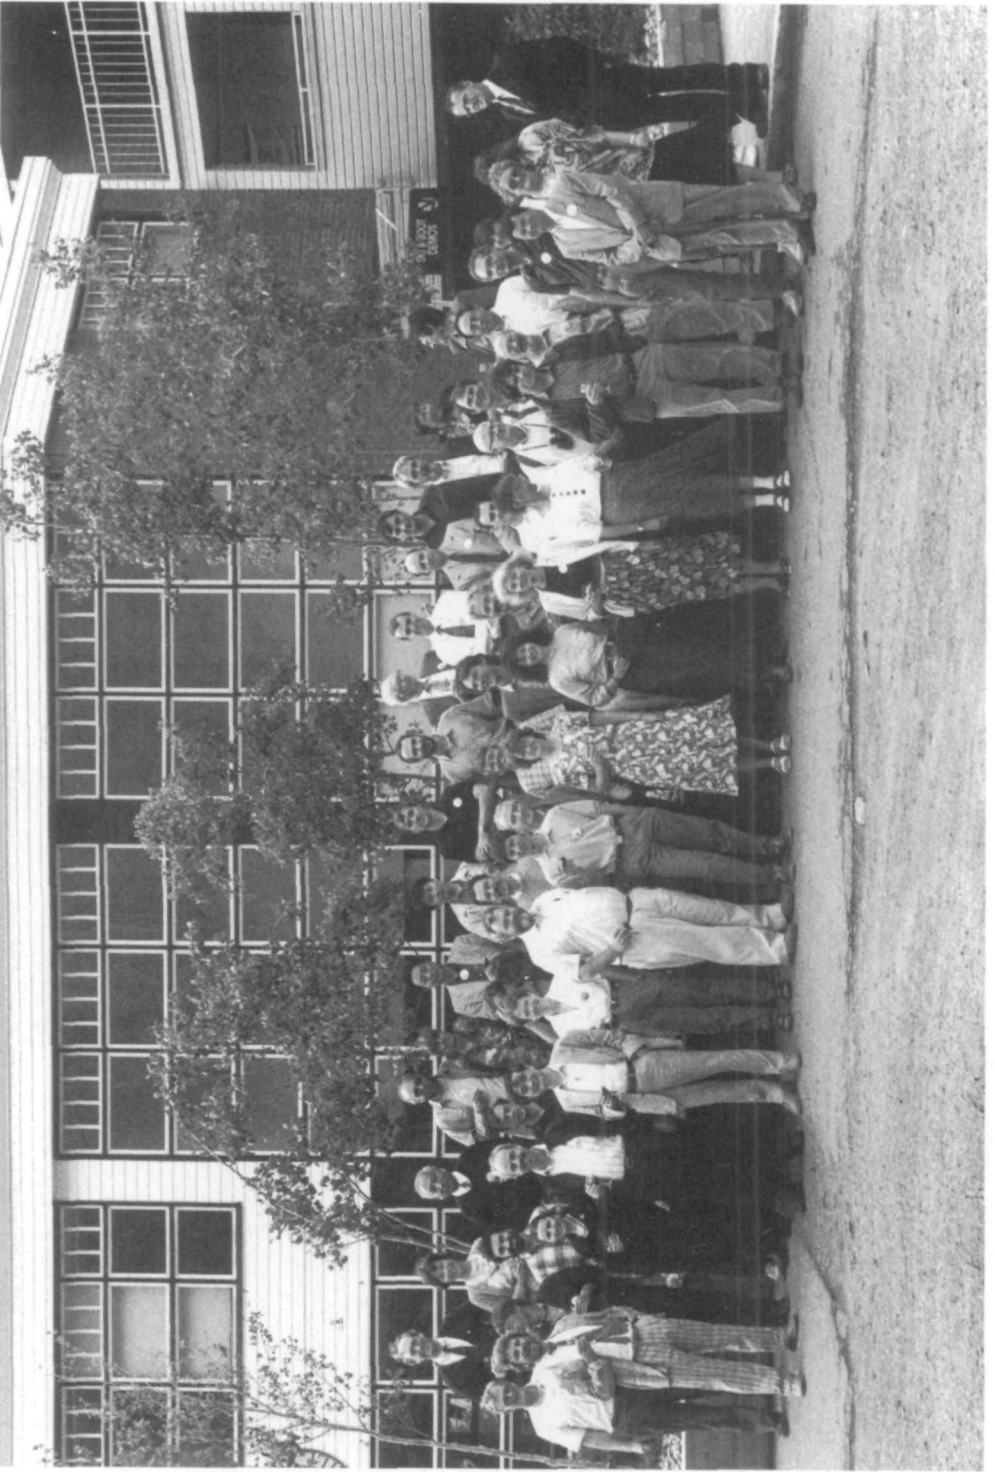

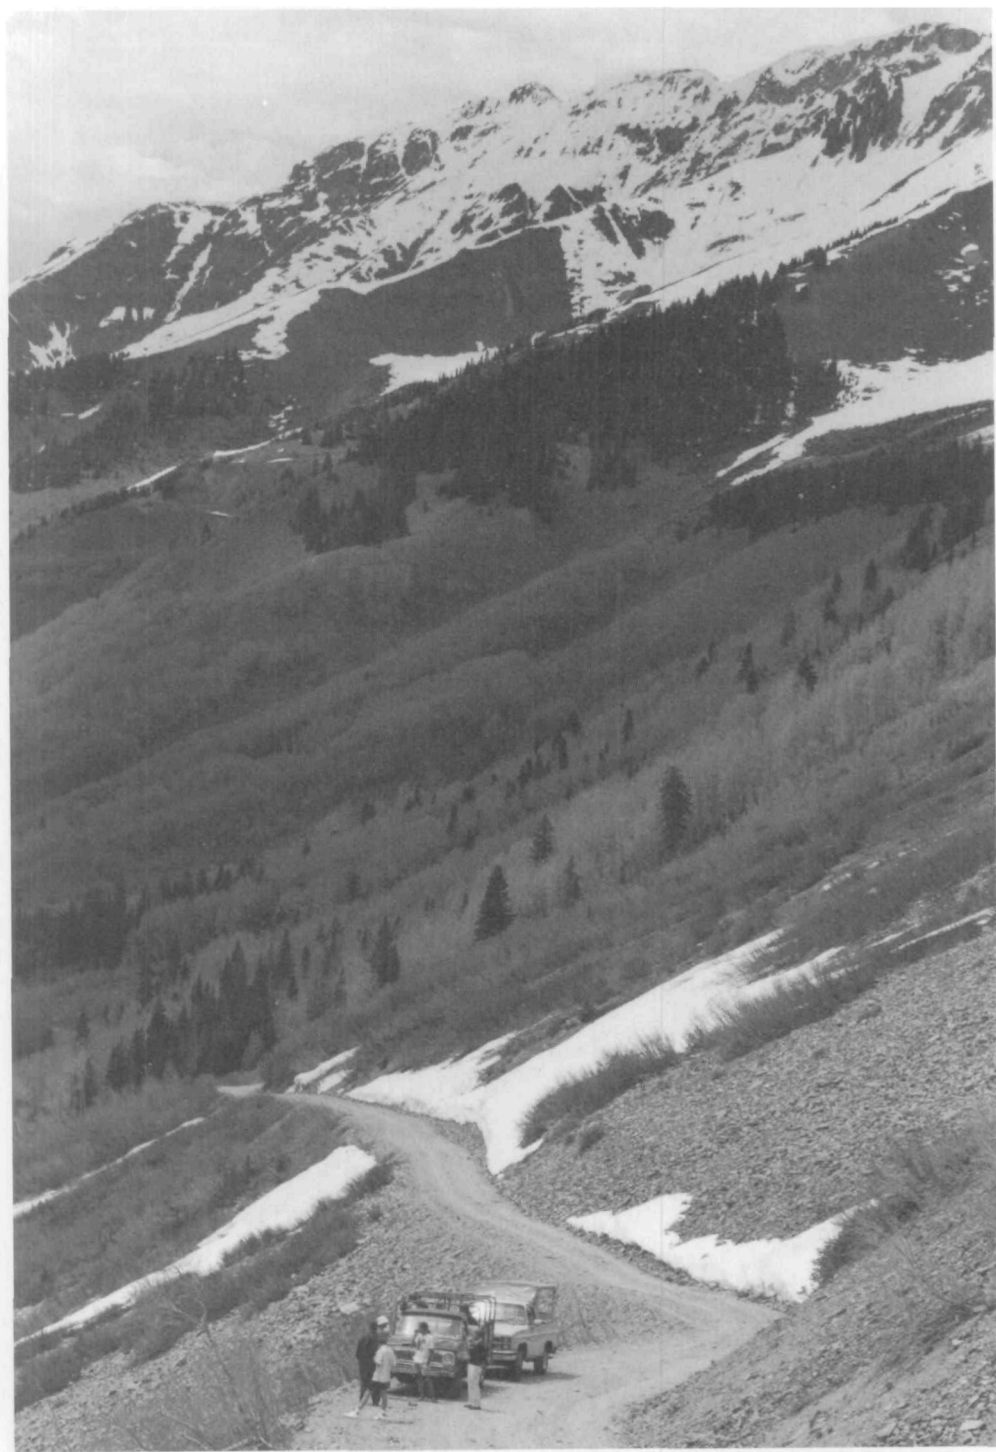

The jeep trip
